# Supplementary material for: Experience of a Neuro-Emergency Expert in the Emergency Department during One Year of the COVID-19 Pandemic
Source: MDPI journal article supplement (doi:10.3390/ijerph18189461), 2021-09-08
Supplement: s1 [file s1]

**Table S1.** Various spectrums of ED diagnosis according to the chief complaints. (described as Emergency department diagnosis of enrolled patients).
